# Supplementary material for: Integrated transcriptome and miRNA analysis uncovers molecular regulators of aerial stem-to-rhizome transition in the medical herb Gynostemma pentaphyllum
Source: PubMed Central journal article supplement (PMC6858658; doi:10.1186/s12864-019-6250-8), 2019-11-15

**a**

Co E  
V Pe  
Pi

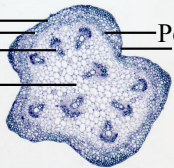**b**

Co V  
E Pi  
Pe

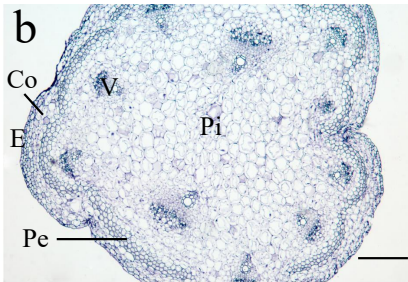**c**

E  
Co  
Pe  
V  
Pi

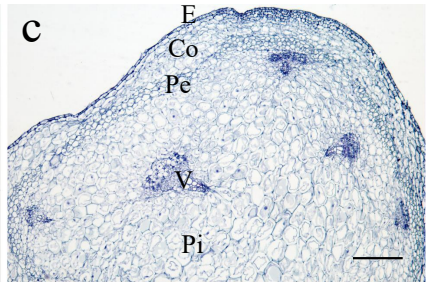**d**

Co  
Pe

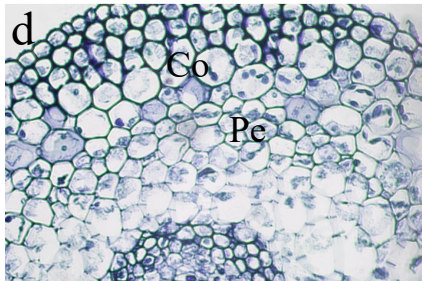**e**

Co Pe

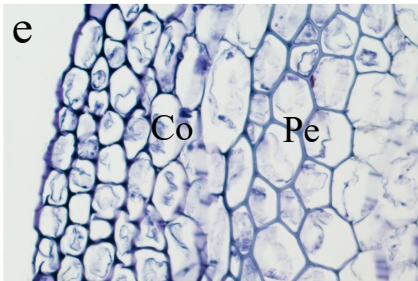**f**

Co Pe

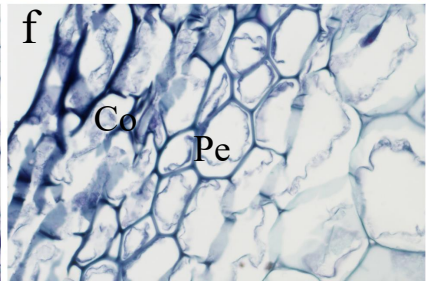

Supplement: 12864_2019_6250_MOESM1_ESM.pdf [file 12864_2019_6250_MOESM1_ESM.pdf]
