# Supplementary material for: Integrated transcriptome and miRNA analysis uncovers molecular regulators of aerial stem-to-rhizome transition in the medical herb Gynostemma pentaphyllum
Source: PubMed Central journal article supplement (PMC6858658; doi:10.1186/s12864-019-6250-8), 2019-11-15

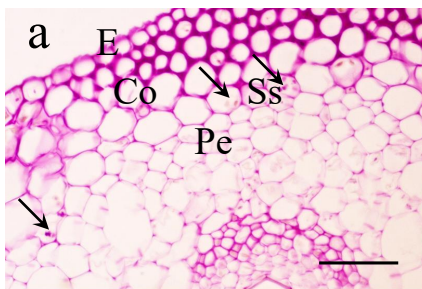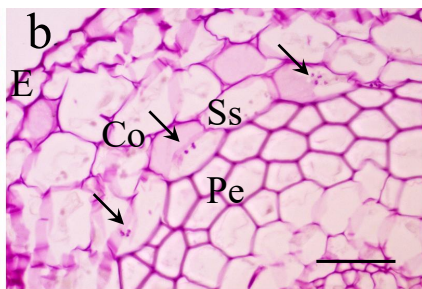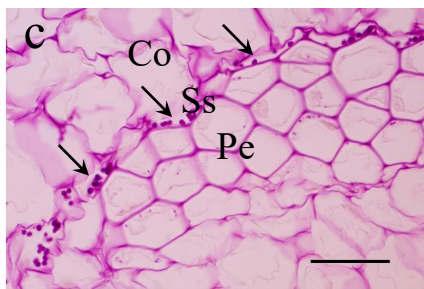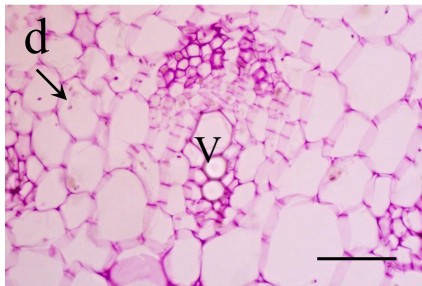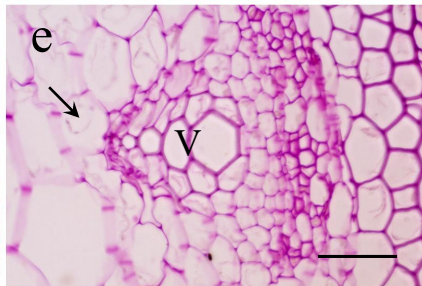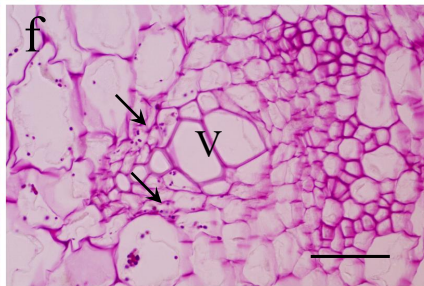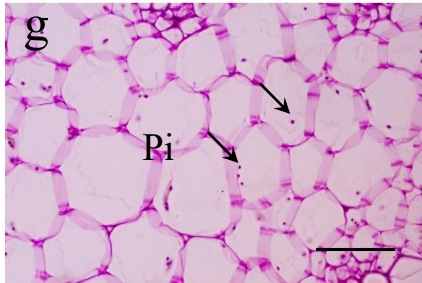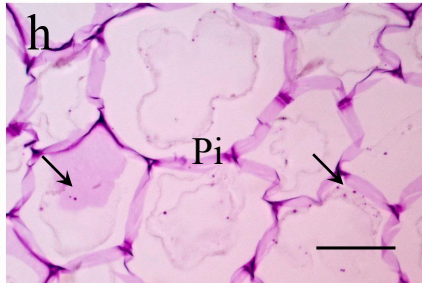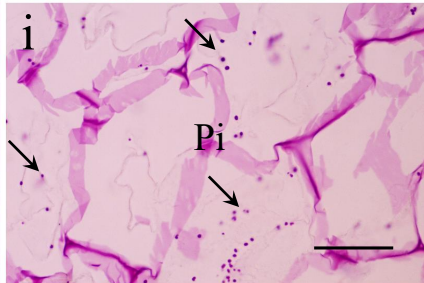

Supplement: 12864_2019_6250_MOESM2_ESM.pdf [file 12864_2019_6250_MOESM2_ESM.pdf]
